# Supplementary material for: 1D-CoSe2 nanoarray: a designed structure for efficient hydrogen evolution and symmetric supercapacitor characteristics
Source: Royal Society of Chemistry journal article supplement (doi:10.1039/d0dt02548h), 2020-01-01
Supplement: d0dt02548h1.pdf [file d0dt02548h1.pdf]

## Supporting Information

### **1D-CoSe<sub>2</sub> nanoarray: A designed structure for efficient hydrogen evolution and symmetric supercapacitor characteristics**

Iqra Rabani,<sup>a,1</sup> Sajjad Hussain,<sup>a, b,1</sup> Dhanasekaran Vikraman,<sup>c</sup> Young-Soo Seo,<sup>a</sup> Jongwan Jung,<sup>a,b</sup>

Jana Atanu,<sup>d</sup> Nabeen K Shrestha,<sup>d</sup> Mohammed Jalalah,<sup>e</sup> Yong-Young Noh,<sup>f</sup> Supriya A. Patil<sup>a,\*</sup>

<sup>a</sup> Department of Nanotechnology and Advanced Materials Engineering, Sejong University, 209, Neung dong-ro, Gwangjin-gu, Seoul 05006, Republic of Korea.

<sup>b</sup> Hybrid Materials Research Center (HMC), Sejong University, 209, Neung dong-ro, Gwangjin-gu, Seoul 05006, Republic of Korea.

<sup>c</sup> Division of Electronics and Electrical Engineering, Dongguk University-Seoul, Seoul, 04620, Republic of Korea.

<sup>d</sup> Division of Physics and Semiconductor Science, Dongguk University, Seoul 04620, Republic of Korea.

<sup>e</sup> Promising Centre for Sensors and Electronic Devices (PCSED), Department of Electrical Engineering, Faculty of Engineering, Najran University, P.O. Box 1988, Najran, 11001, Saudi Arabia

<sup>f</sup> Department of Energy and Materials Engineering, Dongguk University, Seoul, 04620, Republic of Korea

<sup>1</sup>These authors are contributed equally.

\*Corresponding author: Dr. Supriya A.Patil; [supriyaapatil11@gmail.com](mailto:supriyaapatil11@gmail.com)

## **S1. Characterization details of 1D-Co<sub>3</sub>O<sub>4</sub> and 1D-CoSe<sub>2</sub> nanoarrays**

The crystallinity of synthesized nanoarrays structures were analyzed by Raman spectroscopy (Renishaw inVia RE04, 512 nm Ar laser) with a spot size of 1  $\mu\text{m}$  and a scan speed of 30 seconds. X-ray photoelectron spectroscopy (PHI 5000 Versa Probe, 25W Al K $\alpha$ ,  $6.7 \times 10^{-8}$  Pa) was used to characterize the surface binding energy and composition. field emission-scanning electron microscopy (HITACHI S-4700) was used to examine the morphology and microstructure of the films. The atomic structure of 1D-CoSe<sub>2</sub> nanoarray was captured by a JEOL-2010F high resolution-transmission electron microscopy with an accelerating voltage of 200 keV. The 1D-Co<sub>3</sub>O<sub>4</sub> and 1D-CoSe<sub>2</sub> nanoarray structures were analyzed by in-plane X-ray diffraction (Rigaku) with Cu-K $\alpha$  ( $\lambda = 1.5406 \text{ \AA}$ ) radiation operated at 50 KV and 300mA.

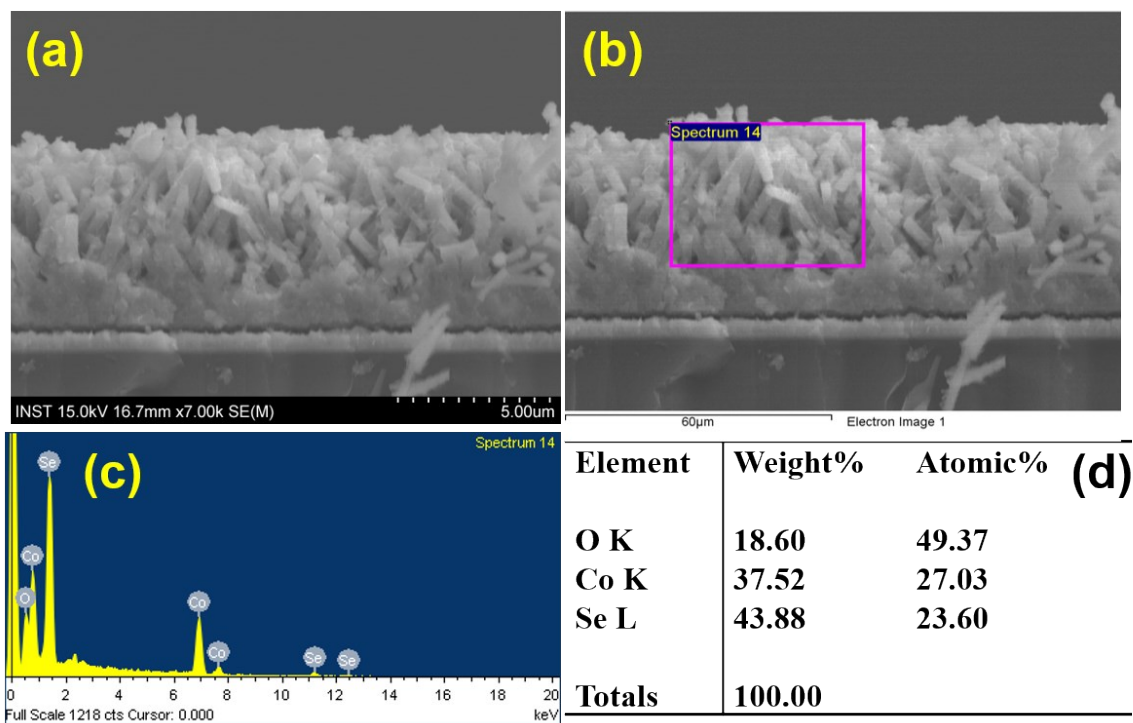

**Figure S1.** (a-b) FE-SEM cross-sectional images and (c-d) EDS spectrum of 1D-CoSe<sub>2</sub> (t<sub>ex</sub>-48h) nanoarrays with their composition ratio.

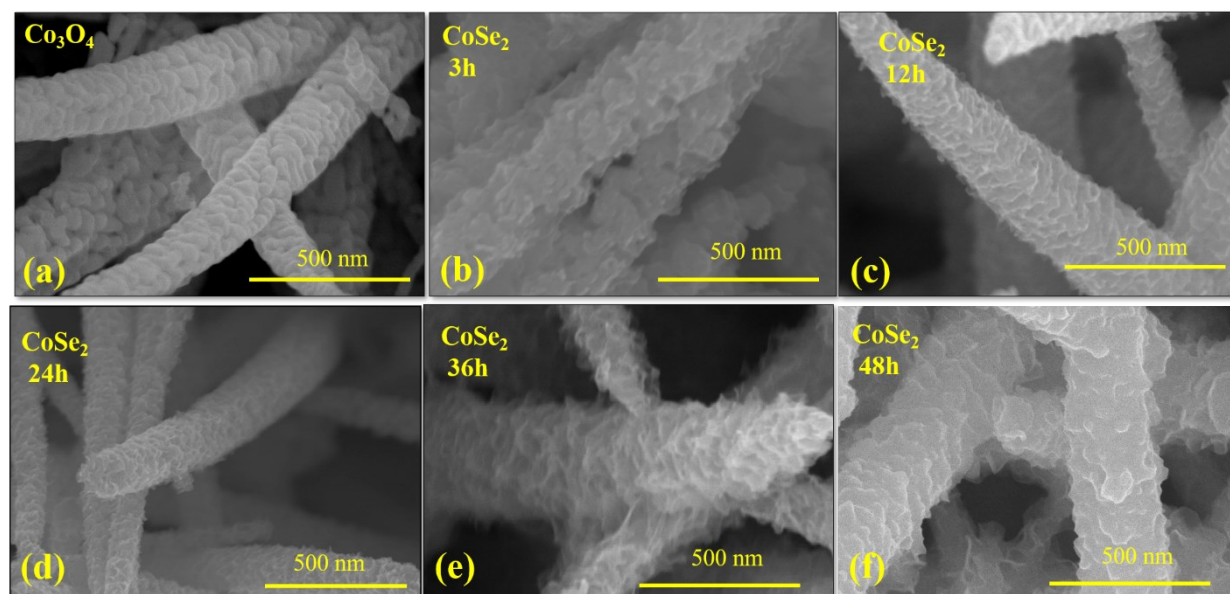

**Figure S2.** High magnification FESEM images of (a) 1D-Co<sub>3</sub>O<sub>4</sub> and (b-f) 1D-CoSe<sub>2</sub> with different ion exchange time (b) 3, (c) 12, (d) 24, (e) 36 and (f) 48 h.

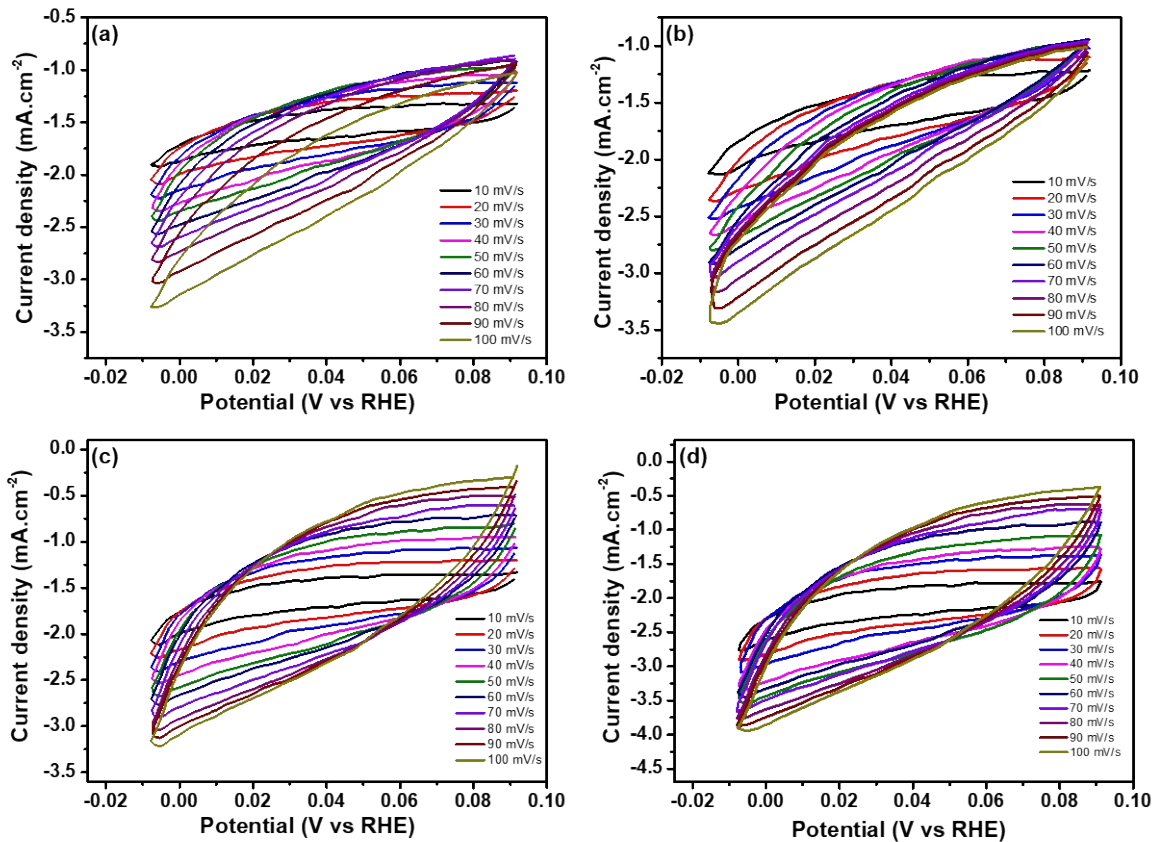

**Figure S3.** The CV profiles acquired at various scan rates in the non-Faradaic region of acidic medium for (a) 1D-CoSe<sub>2</sub>(t<sub>ex</sub>-12h), (b) 1D-CoSe<sub>2</sub>(t<sub>ex</sub>-24h), (c) 1D-CoSe<sub>2</sub>(t<sub>ex</sub>-36h) and (d) 1D-CoSe<sub>2</sub>(t<sub>ex</sub>-48h) nanoarrays electrocatalysts.

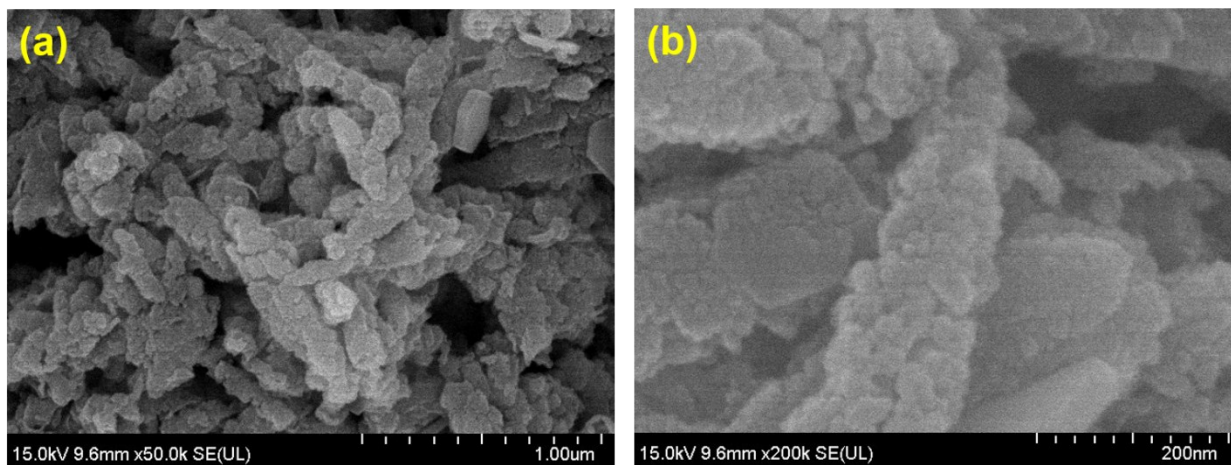

**Figure S4.** FESEM images of 1D-CoSe<sub>2</sub>(t<sub>ex</sub>-48h) electrocatalyst after 25h HER performance in acidic medium.

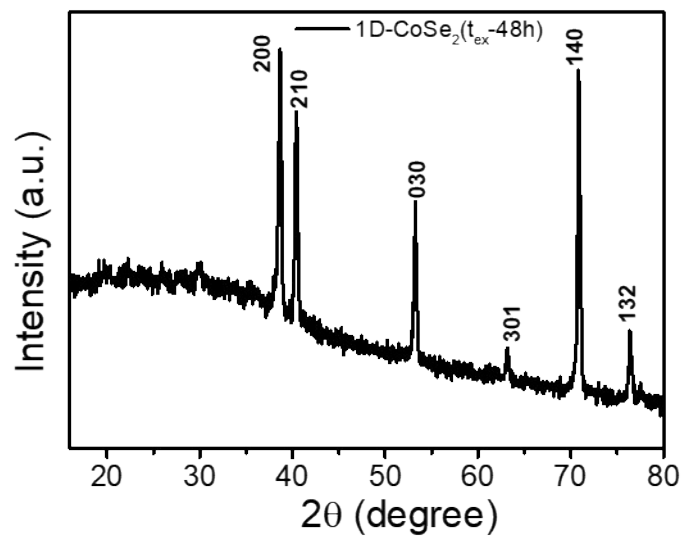

**Figure S5.** XRD spectrum for 1D-CoSe<sub>2</sub>(t<sub>ex</sub>-48h) electrocatalyst after 25h HER performance in acidic medium.

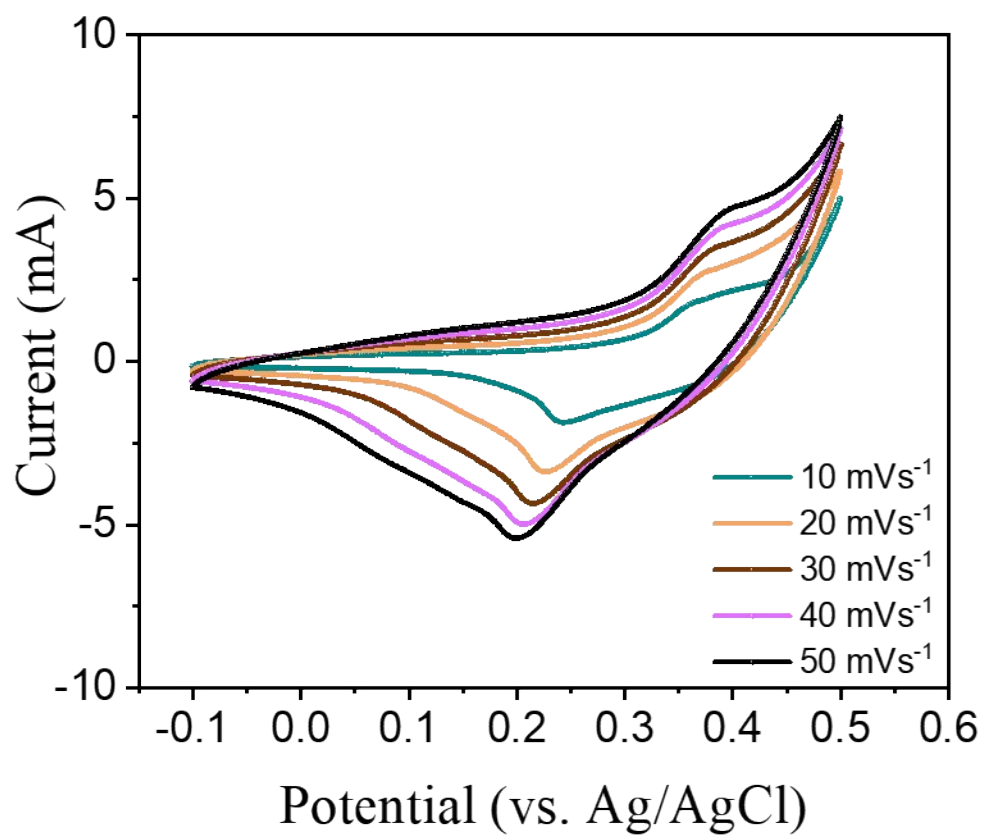

**Figure S6.** Cyclic voltammograms of 1D-Co<sub>3</sub>O<sub>4</sub> electrode at different scan rates.



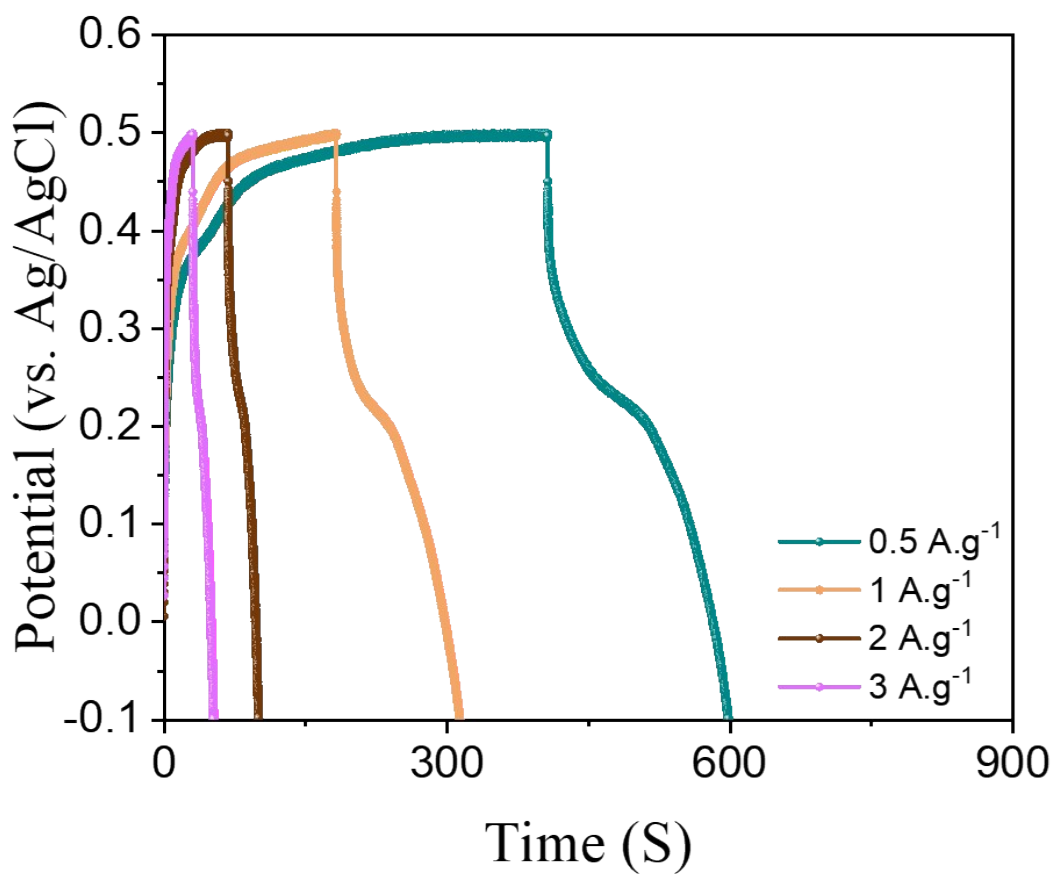

**Figure S7.** Galvanostatic charge-discharge profiles for 1D-Co<sub>3</sub>O<sub>4</sub> electrode at various current densities.

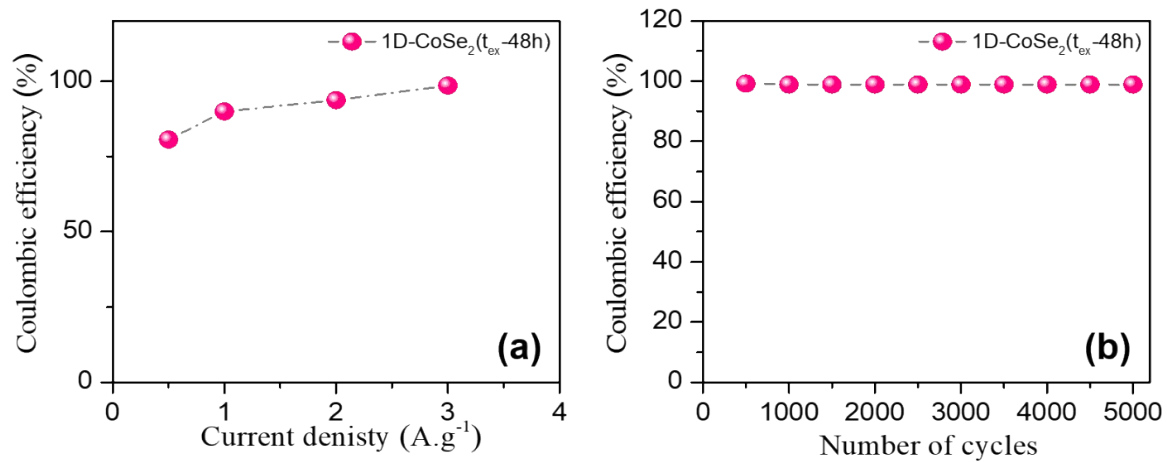

**Figure S8.** Coulombic efficiency of SSC device (a) different current densities and (b) 5000 cycles at current density 3 A.g<sup>-1</sup>.

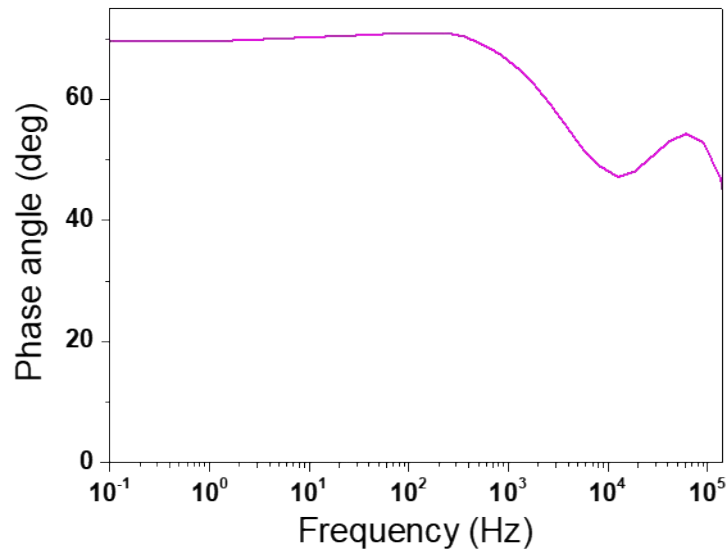

Figure S9. Bode phase plot for 1D-CoSe<sub>2</sub>(t<sub>ex</sub>-48h) SSC electrode.

Table S1 Comparison of catalytic parameters of different HER catalysts

| Catalyst                                    | Onset potential<br>(mV vs RHE)<br>@10 mA cm <sup>-2</sup> | Tafel slope<br>(mV dec <sup>-1</sup> ) | Exchange current density<br>(j <sub>0</sub> , mA cm <sup>-2</sup> ) |
|---------------------------------------------|-----------------------------------------------------------|----------------------------------------|---------------------------------------------------------------------|
| 1D-Co <sub>3</sub> O <sub>4</sub>           | 377                                                       | 98                                     | 1.25×10 <sup>-3</sup>                                               |
| 1D-CoSe <sub>2</sub> (t <sub>ex</sub> -3h)  | 314                                                       | 88                                     | 7.07×10 <sup>-3</sup>                                               |
| 1D-CoSe <sub>2</sub> (t <sub>ex</sub> -12h) | 265                                                       | 78                                     | 1.62×10 <sup>-2</sup>                                               |
| 1D-CoSe <sub>2</sub> (t <sub>ex</sub> -24h) | 254                                                       | 78                                     | 3.25×10 <sup>-2</sup>                                               |
| 1D-CoSe <sub>2</sub> (t <sub>ex</sub> -36h) | 241                                                       | 73                                     | 4.57×10 <sup>-2</sup>                                               |
| 1D-CoSe <sub>2</sub> (t <sub>ex</sub> -48h) | 216                                                       | 72                                     | 5.62×10 <sup>-2</sup>                                               |
| Pt                                          | 135                                                       | 57                                     | 1.02×10 <sup>-1</sup>                                               |

Table S2. HER catalytic performances TMDs-based electrocatalysts

| Electrocatalyst                         | Electrolyte          | $\eta$ (mV)                      | Tafel Slope (mV $\cdot$ dec $^{-1}$ ) | $j_0$ (mA $\cdot$ cm $^{-2}$ )      | Ref.      |
|-----------------------------------------|----------------------|----------------------------------|---------------------------------------|-------------------------------------|-----------|
| 1D-CoSe $_2$ ( $t_{ex}$ -48h) nanoarray | 0.5 M H $_2$ SO $_4$ | 41 and 216 @ 1 and 10 mA/cm $^2$ | 78                                    | $5.62 \times 10^{-2}$               | This work |
| CoS $_2$ /CoSe $_2$ hybrid              | 0.5 M H $_2$ SO $_4$ | 80 @ 10 mA/cm $^2$               | 33.6                                  | 37.8 $\mu$ A $\cdot$ cm $^{-1}$     | 1         |
| CoSe $_2$ NW/CC                         | 0.5 M H $_2$ SO $_4$ | 130 @ 10 mA/cm $^2$              | 32                                    | -                                   | 2         |
| CoSe $_2$ nanorods                      | 0.5 M H $_2$ SO $_4$ | 205 @ 100 mA/cm $^2$             | 35                                    | -                                   | 3         |
| CoSe $_2$ Nanocrystals                  | 0.5 M H $_2$ SO $_4$ | 160 @ 10 mA/cm $^2$              | 40                                    | -                                   | 4         |
| CoS $_2$ /CoSe@C                        | 0.5 M H $_2$ SO $_4$ | 164 @ 10 mA/cm $^2$              | 42                                    | -                                   | 5         |
| CoSe $_2$ nanoparticles                 | 0.5 M H $_2$ SO $_4$ | 137 @ 10 mA/cm $^2$              | 40                                    | -                                   | 6         |
| CoP nanowire arrays                     | 1.0 M KOH            | 209 @ 10 mA/cm $^2$              | 129                                   | -                                   | 7         |
| CoSe $_2$ @GO                           | 0.5 M H $_2$ SO $_4$ | 210 @ 10 mA/cm $^2$              | 42                                    | -                                   | 8         |
| Cubic pyrite-type CoSe $_2$             | 0.5 M H $_2$ SO $_4$ | 193 @ 10 mA/cm $^2$              | 40                                    | -                                   | 9         |
| Co $_3$ O $_4$ @Ni                      | 0.5 M H $_2$ SO $_4$ | 220 @ 10 mA/cm $^2$              | 53                                    | -                                   | 10        |
| WS $_2$ /CoSe $_2$ heterostructure      | 0.5 M H $_2$ SO $_4$ | 160 @ 10 mA/cm $^2$              | 44                                    | $1.44 \times 10^{-2}$ mA cm $^{-2}$ | 11        |

Table S3. Solid-state supercapacitors performances of TMDs-based electrodes

| Electrode materials                                   | Electrolyte                                          | Specific capacitance                            | Energy density             | Power density           | Capacitance retention (%) / cycles | Ref.          |
|-------------------------------------------------------|------------------------------------------------------|-------------------------------------------------|----------------------------|-------------------------|------------------------------------|---------------|
| 1D-CoSe <sub>2</sub> (t <sub>ex</sub> -48h) nanoarray | PVA/KOH                                              | 152 F·g <sup>-1</sup> @ 0.5 A·g <sup>-1</sup>   | 21.1 Wh kg <sup>-1</sup>   | 0.5 kW kg <sup>-1</sup> | 95.8/5000                          | In this study |
| MoS <sub>2</sub> /CNS                                 | 1 M Na <sub>2</sub> SO <sub>4</sub>                  | 108 F g <sup>-1</sup> at 1 A g <sup>-1</sup>    | 74 Wh/kg                   | 3700 W/Kg               | -                                  | 12            |
| Co <sub>3</sub> O <sub>4</sub> /VAGN /carbon          | PVA/KOH                                              | 580 F g <sup>-1</sup> @1 A g <sup>-1</sup>      | 80 Wh/kg                   | 27 Wh/kg                | 86.2/20000                         | 13            |
| Ni <sub>0.85</sub> Se@MoSe <sub>2</sub> /graphene     | 2 M KOH                                              |                                                 | 25.5 Wh/kg                 | 420 W/kg                | 95/20000                           | 14            |
| PEDOT/CNTs                                            | PVA/H <sub>2</sub> SO <sub>4</sub> /H <sub>2</sub> O | 147 F·g <sup>-1</sup> at 0.5 A·g <sup>-1</sup>  | 12.6 Wh·kg <sup>-1</sup>   | 1 kW·Kg <sup>-1</sup>   | 95/3000                            | 15            |
| WS <sub>2</sub> nanosheets                            | PVA/LiCl                                             | 0.93 F cm <sup>-2</sup>                         | 0.97 m Wh cm <sup>-3</sup> | 0.7 W cm <sup>-3</sup>  | 82/10000                           | 16            |
| MoS <sub>2</sub> -NH <sub>2</sub> /PANI nanosheets    | 1 M H <sub>2</sub> SO <sub>4</sub>                   | 58.6 F g <sup>-1</sup>                          | 4.0 Wh/kg                  | 175W/kg                 | 96.5/10000                         | 17            |
| Ni <sub>0.6</sub> Co <sub>0.4</sub> Se <sub>2</sub>   | PVA-KOH                                              | 402 F g <sup>-1</sup> at 0.5 A g <sup>-1</sup>  | 42.1 Wh/kg                 |                         | 91.0/ 5000                         | 18            |
| (Mo <sub>2</sub> C/NCF)                               | PVA-KOH                                              | 75 F g <sup>-1</sup> @0.5 A g <sup>-1</sup>     | 54 Wh/kg                   | 1080 W/Kg               | 100/ 5000                          | 19            |
| WTe <sub>2</sub> Nanosheets                           | H <sub>3</sub> PO <sub>4</sub> /PVA                  | 74 F cm <sup>-3</sup>                           | 0.01 Wh cm <sup>-3</sup>   | 83.6 W cm <sup>-3</sup> | 91/5500                            | 20            |
| VSL-MoS <sub>2</sub> @3D-Ni foam                      | Na <sub>2</sub> SO <sub>4</sub> /PVA                 | 34.1 F g <sup>-1</sup> @ 1.3 A g <sup>-1</sup>  | 4.7 W h/kg                 | 650 W/kg                | 82.5/10000                         | 21            |
| MoS <sub>2</sub> /G nanobelts                         | 1 M Na <sub>2</sub> SO <sub>4</sub>                  | 278.2 F g <sup>-1</sup> @ 0.8 A g <sup>-1</sup> | 38.6 Wh/kg                 | 0.4 kW/Kg               | -                                  | 22            |
| MoS <sub>2</sub> NSs @PANI nanoneedle arrays          | 0.5 M H <sub>2</sub> SO <sub>4</sub>                 | 853 F g <sup>-1</sup> @1 A g <sup>-1</sup>      | 106 Wh/kg                  | 106 KW/kg               | 91/4000                            | 23            |

## References

1. Y. Guo, C. Shang and E. Wang, *Journal of Materials Chemistry A*, 2017, **5**, 2504-2507.
2. Q. Liu, J. Shi, J. Hu, A. M. Asiri, Y. Luo and X. Sun, *ACS applied materials & interfaces*, 2015, **7**, 3877-3881.
3. Y. Deng, C. Ye, G. Chen, B. Tao, H. Luo and N. Li, *Journal of Energy Chemistry*, 2019, **28**, 95-100.
4. I. H. Kwak, H. S. Im, D. M. Jang, Y. W. Kim, K. Park, Y. R. Lim, E. H. Cha and J. Park, *ACS applied materials & interfaces*, 2016, **8**, 5327-5334.

5. K. Karuppasamy, R. Bose, V. R. Jothi, D. Vikraman, Y.-T. Jeong, P. Arunkumar, D. B. Velusamy, T. Maiyalagan, A. Alfantazi and H.-S. Kim, *Journal of Alloys and Compounds*, 2020, 155537.
6. D. Kong, H. Wang, Z. Lu and Y. Cui, *Journal of the American Chemical Society*, 2014, **136**, 4897-4900.
7. J. Tian, Q. Liu, A. M. Asiri and X. Sun, *Journal of the American Chemical Society*, 2014, **136**, 7587-7590.
8. C. Dai, X. Tian, Y. Nie, C. Tian, C. Yang, Z. Zhou, Y. Li and X. Gao, *Chemical Engineering Journal*, 2017, **321**, 105-112.
9. H. Zhang, L. Lei and X. Zhang, *RSC advances*, 2014, **4**, 54344-54348.
10. R. Li, D. Zhou, J. Luo, W. Xu, J. Li, S. Li, P. Cheng and D. Yuan, *Journal of Power Sources*, 2017, **341**, 250-256.
11. S. Hussain, K. Akbar, D. Vikraman, H. Liu, S.-H. Chun and J. Jung, *Journal of industrial and engineering chemistry*, 2018, **65**, 167-174.
12. T. N. Khawula, K. Raju, P. J. Franklyn, I. Sigalas and K. I. Ozoemena, *Journal of Materials Chemistry A*, 2016, **4**, 6411-6425.
13. Q. Liao, N. Li, S. Jin, G. Yang and C. Wang, *ACS nano*, 2015, **9**, 5310-5317.
14. H. Peng, C. Wei, K. Wang, T. Meng, G. Ma, Z. Lei and X. Gong, *ACS applied materials & interfaces*, 2017, **9**, 17067-17075.
15. S. Alipoori, S. Mazinani, S. H. Aboutalebi and F. Sharif, *Journal of Energy Storage*, 2020, **27**, 101072.
16. S. Liu, Y. Zeng, M. Zhang, S. Xie, Y. Tong, F. Cheng and X. Lu, *Journal of Materials Chemistry A*, 2017, **5**, 21460-21466.
17. R. Zeng, Z. Li, L. Li, Y. Li, J. Huang, Y. Xiao, K. Yuan and Y. Chen, *ACS Sustainable Chemistry & Engineering*, 2019, **7**, 11540-11549.
18. Y. Wang, R. Liu, S. Sun and X. Wu, *Journal of colloid and interface science*, 2019, **549**, 16-21.
19. K. J. Samdani, D. W. Joh and K. T. Lee, *Journal of Alloys and Compounds*, 2018, **748**, 134-144.
20. P. Yu, W. Fu, Q. Zeng, J. Lin, C. Yan, Z. Lai, B. Tang, K. Suenaga, H. Zhang and Z. Liu, *Advanced Materials*, 2017, **29**, 1701909.

21. R. K. Mishra, A. K. Kushwaha, S. Kim, S. G. Seo and S. H. Jin, *Current Applied Physics*, 2019, **19**, 1-7.
22. Y. Jia, H. Wan, L. Chen, H. Zhou and J. Chen, *Journal of Power Sources*, 2017, **354**, 1-9.
23. J. Zhu, W. Sun, D. Yang, Y. Zhang, H. H. Hoon, H. Zhang and Q. Yan, *Small*, 2015, **11**, 4123-4129.
